# Supplementary material for: Hierarchical semantic composition of biosimulation models using bond graphs
Source: PubMed Central journal article supplement (PMC8148364; doi:10.1371/journal.pcbi.1008859), 2021-05-13
Supplement: pcbi.1008859.s001.pdf [file pcbi.1008859.s001.pdf]

|                       | <b>Parameter</b>     | <b>Value/Option</b>          | <b>Description</b>                                                                             |
|-----------------------|----------------------|------------------------------|------------------------------------------------------------------------------------------------|
| Function coefficients | $a_1$                | 0.0005422                    |                                                                                                |
|                       | $b_1$                | 0.1317                       |                                                                                                |
|                       | $c_1$                | 0.03315                      |                                                                                                |
|                       | $a_2$                | 0.0003591                    |                                                                                                |
|                       | $b_2$                | 0.181                        |                                                                                                |
|                       | $c_2$                | 0.06554                      |                                                                                                |
| Fit options           | <i>DiffMinChange</i> | $1.0e^{-3}$                  |                                                                                                |
|                       | <i>DiffMaxChange</i> | 0.1                          |                                                                                                |
|                       | <i>Robust</i>        | <i>LAR</i>                   | Minimizing the Least Absolute Residuals.                                                       |
|                       | <i>Algorithm</i>     | <i>Levenberg – Marquardt</i> | If the fit generated by the trust-region algorithm is not acceptable, try Levenberg-Marquardt. |
|                       | <i>MaxFunEvals</i>   | 60,000                       | Maximum number of allowed evaluations for the selected function.                               |
|                       | <i>TolFun</i>        | $1.0e^{-9}$                  | Termination tolerance in stopping conditions for the function.                                 |
|                       | <i>TolX</i>          | $1.0e^{-10}$                 | Termination tolerance in stopping conditions for the coefficients.                             |
