# Supplementary material for: Hierarchical semantic composition of biosimulation models using bond graphs
Source: PubMed Central journal article supplement (PMC8148364; doi:10.1371/journal.pcbi.1008859), 2021-05-13

Blood flow (cm<sup>3</sup>/s)

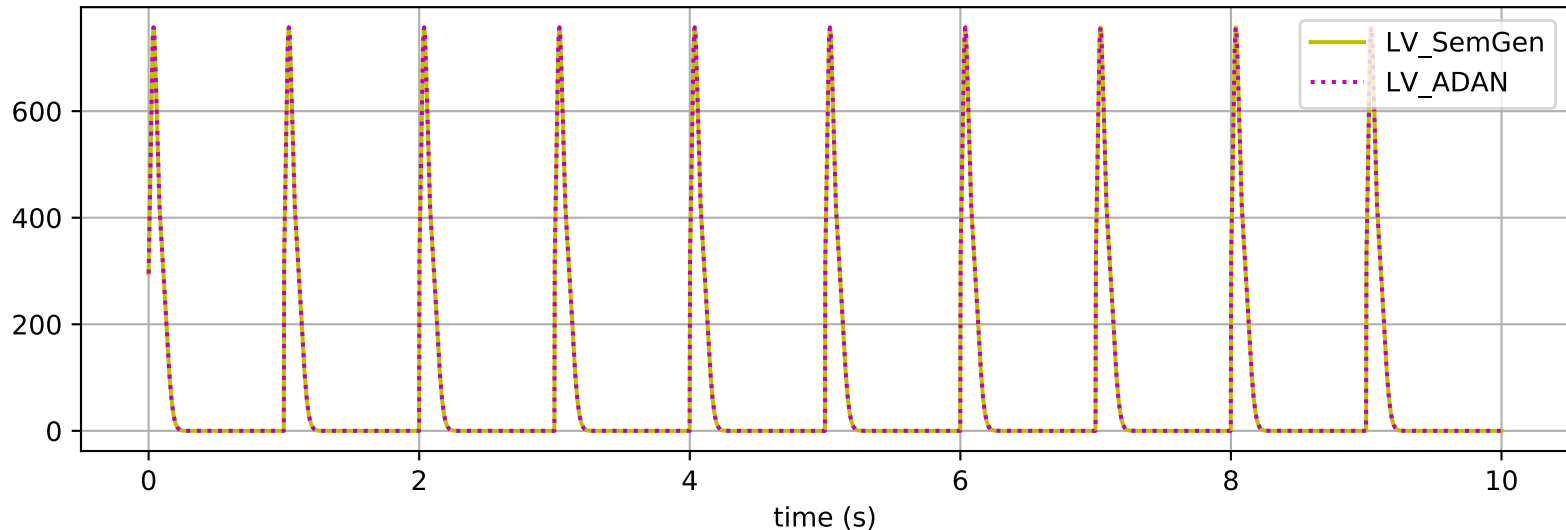

Supplement: pcbi.1008859.s002.pdf [file pcbi.1008859.s002.pdf]
